1 **Fish diversity in a doubly landlocked country - a description of the**  
2 **fish fauna of Uzbekistan using DNA barcoding**

3

4 Bakhtiyor SHERALIEV, Zuogang PENG\*

5

6 Key Laboratory of Freshwater Fish Reproduction and Development (Ministry of Education),  
7 Southwest University, School of Life Sciences, Chongqing 400715, China

8

9

10 **\*Correspondence:**

11 Zuogang Peng, School of Life Sciences, Southwest University, Chongqing, China.

12 Email: [pzg@swu.edu.cn](mailto:pzg@swu.edu.cn)

13

14

15 **ORCID**

16 Bakhtiyor Sheraliev <https://orcid.org/0000-0003-3966-7403>

17 Zuogang Peng <https://orcid.org/0000-0001-8810-2025>

18 **Abstract**

19 Uzbekistan is one of two doubly landlocked countries in the world, where all rivers are endorheic  
20 basins. Although fish diversity is relatively poor in Uzbekistan compared to other regions, the  
21 fish fauna of the region has not yet been fully studied. The aim of this study was to establish a  
22 reliable barcoding reference database for fish in Uzbekistan. A total of 666 specimens, belonging  
23 to 59 species within 39 genera, 16 families, and 9 orders, were subjected to polymerase chain  
24 reaction amplification in the barcode region and sequenced. The length of the 666 barcodes was  
25 682 bp. The average K2P distances within species, genera, and families were 0.22%, 6.33%, and  
26 16.46%, respectively. The average interspecific distance was approximately 28.8 times higher  
27 than the mean intraspecific distance. The Barcode Index Number (BIN) discordance report  
28 showed that 666 specimens represented 55 BINs, of which five were singletons, 45 were  
29 taxonomically concordant, and five were taxonomically discordant. The barcode gap analysis  
30 demonstrated that 89.3% of the fish species examined could be discriminated by DNA  
31 barcoding. These results provide new insights into fish diversity in the inland waters of  
32 Uzbekistan and can provide a basis for the development of further studies on fish fauna.

### 33 **Introduction**

34 Spanning more than 35,800 species [1], fish account for half of all extant vertebrate species and  
35 are well known for their uneven distribution of species diversity [2]. Consequently, fish  
36 constitute a significant component of biodiversity in the composition of animal taxa [3, 4].  
37 Additionally, they have direct economic value and are important sources of animal protein for  
38 humans [5, 6]. However, every year the richness and abundance of fish biodiversity in aquatic  
39 ecosystems become more vulnerable, owing to human disturbances [7, 8]. Although  
40 approximately 400 new fish species have been described annually over the past 20 years [1],  
41 anthropogenic impacts, such as water pollution from plastic and other household waste, river  
42 dams, water withdrawal, overfishing, poaching, and habitat degradation have resulted in a  
43 catastrophic loss of fish diversity [9-11]. In-depth taxonomic studies of species are key to  
44 conserving biodiversity.

45 Generally, fish species identification and taxonomy rely on morphometric and meristic  
46 characteristics, such as body shape, the number of fin rays or lateral line scales, allometric  
47 features, and colour patterns. However, morphological characters are not always stable during  
48 various developmental stages and often cannot be assessed in incomplete samples or rare and  
49 cryptic species. Moreover, fish identification can be challenging, owing to the similar  
50 morphology of congeners during their early life histories as well as due to contradictions in the  
51 existing literature and taxonomic history; this is true even if experienced taxonomists work with  
52 whole intact adults. In addition, different taxonomists may have different identification abilities  
53 and skills, thus even the same specimen may be identified inconsistently, thereby resulting in  
54 confusion when summarising and comparing data [12-14]. However, environmental and  
55 conservation studies call for a high level of accuracy, requiring specimens to be identified

56 entirely at the species level [15]. The inherent limitations of morphology-based taxonomy and  
57 the decreased number of taxonomists require molecular approaches for fish species identification  
58 [16].

59 Molecular identification, which identifies species using molecular markers, is widely used  
60 today. Among the various molecular approaches used for species molecular identification, DNA  
61 barcoding based on mitochondrial DNA (mtDNA) is one of the most suitable tools for species-  
62 level identification [17, 18]. In addition, mtDNA-based molecular identification has several  
63 advantages over morphological approaches. First, species identification does not require  
64 complete specimens; however, a tiny piece of tissue such as muscle, skin, fin, or teeth is  
65 acceptable for DNA extraction [18-20]. Second, DNA is more stable than morphological  
66 characters and is more resistant to degradation. For example, DNA can be extracted from water  
67 and soil previously occupied by an organism, or from samples that have been processed or  
68 digested [21-24]. Third, it is difficult to distinguish some species with similar morphological  
69 characteristics, such as cryptic or sibling species. Molecular identification can help accurately  
70 distinguish among such species [25, 26]. Fourth, DNA is invariable throughout the  
71 developmental stages of an organism. In contrast, morphological characters can change during a  
72 life cycle, thereby leading to species misidentification [12]. Therefore, molecular approaches can  
73 be applied in the identification of fish eggs, larvae, juveniles, and adults [13, 27]. Fifth,  
74 becoming a professional traditional taxonomist requires a lot of time, work, and resources [28,  
75 29]. Advances in technology make it fairly easy to replicate and read DNA sequences, while  
76 bioinformatic software can automatically compare the resulting sequences; therefore, the training  
77 required to approach molecular identification is much less than that required for morphological  
78 identification. Molecular identification is widely used in a number of other fields besides species

79 identification, including illegal species trade, food fraud, biological invasions, and biodiversity  
80 monitoring [30-33].

81 If mitochondrial DNA contains 37 genes, a number of mitochondrial genes, such as 12S  
82 ribosomal RNA (12S), 16S rRNA (16S), cytochrome b (CYTB), and control region (D-loop  
83 region), have been used as genetic markers for molecular identification [34-36]. Hebert et al. [17]  
84 pioneered the use of cytochrome c oxidase subunit I (COI) for molecular species identification,  
85 showing that this genetic marker can serve as a DNA barcode for biological identification in both  
86 invertebrates and vertebrates [18, 25, 37-39]. The Fish Barcode of Life Initiative (FISH-BOL) is  
87 an international research collaboration aimed at creating a standardised reference library of DNA  
88 barcodes for all fish species [40, 41]. The main goal of this project is to enable the identification  
89 of fish species by comparing the sequence of queries against the database of reference sequences  
90 in the Barcode of Life Data Systems (BOLD) [42]. To date, many studies have been carried out  
91 worldwide on fish DNA barcoding dedicated to FISH-BOL [3, 4, 18, 43, 44]. Compared to other  
92 regions of the world, studies devoted to fish barcoding are almost absent in Central Asia.

93 Uzbekistan is one of two doubly landlocked countries in the world, where all rivers are  
94 endorheic basins; therefore, fish biodiversity is poor. According to Mirabdullaev and Mullabaev  
95 [45], the total number of fish species in Uzbekistan exceeds 71, including 26 fish species  
96 introduced into the inland waters of the country. At the same time, the drying up of the Aral Sea,  
97 which is the largest water basin in the region, global climate change, population growth, river  
98 damming, water pollution, water withdrawals for agriculture, poaching, overfishing, and habitat  
99 destruction, all affect the fish species in the region [46, 47]. To date, studies on piscifauna have  
100 been based mainly on traditional morphological criteria and have not been comprehensively

101 barcoded, except in our recent studies [48-50]. Recently, molecular identification has been  
102 applied to identify mainly nematodes among animal species [51].

103 Consequently, the main aim of the present study was to provide the first inventory of  
104 freshwater fish species in Uzbekistan based on DNA barcoding. This inventory could serve as a  
105 reference for screening DNA sequences in future studies. Additionally, we assessed the genetic  
106 diversity of freshwater fish species. The DNA barcode records generated in this study will be  
107 available to researchers for the monitoring and conservation of fish diversity in Uzbekistan.

108

## 109 **Results**

110 **Morphology-based species identification** First, all collected specimens were identified using  
111 morphological approaches. Morphological identification classified all samples into 59 species  
112 belonging to 39 genera and 16 families that represented nine orders (Table 1). The identified  
113 specimens included 50 (84.75%) species identified to the species level and nine (15.25%) species  
114 that could not be identified to the species level (Tables 1 and S2). Approximately three-quarters  
115 of the species (44 species, 74.58%) belonged to the order Cypriniformes. The remaining eight  
116 orders included one or two species.

117 Of the 59 fish species collected from the inland waters of Uzbekistan,  
118 *Pseudoscaphirhynchus hermanni* and *P. kaufmanni* were classified as critically endangered  
119 (CR), *Acipenser baerii* and *Capoetobrama kuschakewitschi* were classified as endangered (EN),  
120 and *Cyprinus carpio* and *Luciobarbus brachycephalus* were classified as vulnerable (VU)  
121 according to International Union for Conservation of Nature's (IUCN) Red List of Threatened  
122 Species. The remaining species were grouped into the least concern (LC) and data deficient (DD)  
123 categories (Table 1).

124

125

126 **Table 1.** List of the fish species of Uzbekistan using in this study

| Species No. | Order              | Family           | Genus                     | Species                     | Sample size      | IUCN status |    |
|-------------|--------------------|------------------|---------------------------|-----------------------------|------------------|-------------|----|
| 1           | Acipenseriformes   | Acipenseridae    | <i>Acipenser</i>          | <i>baerii</i>               | 2                | EN          |    |
| 3           |                    |                  |                           | <i>Pseudoscaphirhynchus</i> | <i>hermanni</i>  | 3           | CR |
| 5           |                    |                  |                           |                             | <i>kaufmanni</i> | 2           | CR |
| 2           | Anabantiformes     | Channidae        | <i>Channa</i>             | <i>argus</i>                | 6                | -           |    |
| 4           | Cypriniformes      | Acheilognathidae | <i>Rhodeus</i>            | <i>ocellatus</i>            | 21               | DD          |    |
| 8           |                    |                  |                           |                             | sp.              | 1           | -  |
| 6           |                    | Cobitidae        | <i>Sabanejewia</i>        | <i>aurata</i>               | 27               | LC          |    |
| 7           |                    | Cyprinidae       | <i>Capoeta</i>            | <i>heratensis</i>           | 25               | -           |    |
| 9           |                    |                  | <i>Carassius</i>          | <i>auratus</i>              | 7                | LC          |    |
| 10          |                    |                  |                           | <i>gibelio</i>              | 28               | -           |    |
| 11          |                    |                  | <i>Cyprinus</i>           | <i>carpio</i>               | 9                | VU          |    |
| 12          |                    |                  | <i>Luciobarbus</i>        | <i>brachycephalus</i>       | 8                | VU          |    |
| 13          |                    |                  |                           | <i>conocephalus</i>         | 15               | -           |    |
| 14          |                    |                  | <i>Schizothorax</i>       | <i>eurystomus</i>           | 38               | LC          |    |
| 15          |                    |                  |                           | <i>fedtschenkoi</i>         | 5                | LC          |    |
| 16          |                    |                  |                           | sp.                         | 5                | -           |    |
| 17          |                    | Gobionidae       | <i>Abbottina</i>          | <i>rivularis</i>            | 11               | -           |    |
| 18          |                    |                  | <i>Gobio</i>              | <i>lepidolaemus</i>         | 18               | LC          |    |
| 19          |                    |                  |                           | <i>nigrescens</i>           | 8                | -           |    |
| 20          |                    |                  |                           | <i>sibiricus</i>            | 2                | LC          |    |
| 21          |                    |                  | <i>Pseudorasbora</i>      | <i>parva</i>                | 11               | LC          |    |
| 22          |                    | Leuciscidae      | <i>Abramis</i>            | <i>brama</i>                | 2                | LC          |    |
| 23          |                    |                  | <i>Alburnoides</i>        | <i>holciki</i>              | 41               | -           |    |
| 24          |                    |                  | <i>Alburnus</i>           | <i>chalcoides</i>           | 12               | -           |    |
| 25          |                    |                  |                           | <i>oblongus</i>             | 8                | -           |    |
| 26          |                    |                  |                           | <i>taeniatus</i>            | 3                | DD          |    |
| 27          |                    |                  | <i>Capoetobrama</i>       | <i>kuschakewitschi</i>      | 8                | EN          |    |
| 28          |                    |                  | <i>Leuciscus</i>          | <i>aspius</i>               | 1                | LC          |    |
| 29          |                    |                  |                           | <i>lehmanni</i>             | 10               | LC          |    |
| 30          |                    |                  | <i>Pelecus</i>            | <i>cultratus</i>            | 4                | LC          |    |
| 31          |                    |                  | <i>Petroleuciscus</i>     | <i>squaliusculus</i>        | 10               | LC          |    |
| 32          |                    |                  | <i>Rutilus</i>            | <i>lacustris</i>            | 11               | -           |    |
| 33          |                    | Nemacheilidae    | <i>Dzihunia</i>           | <i>amudarjensis</i>         | 11               | LC          |    |
| 34          |                    |                  |                           |                             | sp. 1            | 11          | -  |
| 35          |                    |                  |                           | sp. 2                       | 3                | -           |    |
| 36          |                    |                  |                           | sp. 3                       | 8                | -           |    |
| 37          |                    |                  | <i>Paracobitis</i>        | <i>longicauda</i>           | 25               | -           |    |
| 38          |                    |                  | <i>Triplophysa</i>        | <i>ferganaensis</i>         | 20               | -           |    |
| 39          |                    |                  |                           | <i>strauchii</i>            | 29               | LC          |    |
| 40          |                    |                  |                           | sp. 1                       | 4                | -           |    |
| 41          |                    |                  |                           | sp. 2                       | 4                | -           |    |
| 42          |                    | Xenocyprididae   | <i>Ctenopharyngodon</i>   | <i>idella</i>               | 8                | -           |    |
| 43          |                    |                  | <i>Hemiculter</i>         | <i>leucisculus</i>          | 25               | LC          |    |
| 44          |                    |                  | <i>Hypophthalmichthys</i> | <i>molitrix</i>             | 8                | NT          |    |
| 45          |                    |                  |                           | <i>nobilis</i>              | 5                | DD          |    |
| 46          |                    |                  | <i>Mylopharyngodon</i>    | <i>piceus</i>               | 2                | DD          |    |
| 47          |                    |                  | <i>Opsariichthys</i>      | <i>bidens</i>               | 7                | LC          |    |
| 48          |                    |                  | <i>Parabramis</i>         | <i>pekinensis</i>           | 13               | -           |    |
| 49          | Cyprinodontiformes | Poeciliidae      | <i>Gambusia</i>           | <i>holbrooki</i>            | 44               | LC          |    |
| 50          | Esociformes        | Esocidae         | <i>Esox</i>               | <i>lucius</i>               | 3                | LC          |    |
| 51          | Gobiiformes        | Gobiidae         | <i>Neogobius</i>          | <i>melanostomus</i>         | 1                | LC          |    |
| 52          |                    |                  |                           | <i>pallasi</i>              | 1                | LC          |    |
| 53          |                    |                  | <i>Rhinogobius</i>        | sp.                         | 37               | -           |    |
| 54          | Perciformes        | Cottidae         | <i>Cottus</i>             | <i>spinulosus</i>           | 6                | LC          |    |
| 55          |                    | Percidae         | <i>Sander</i>             | <i>lucioperca</i>           | 10               | LC          |    |
| 56          | Salmoniformes      | Salmonidae       | <i>Oncorhynchus</i>       | <i>mykiss</i>               | 2                | -           |    |
| 57          | Siluriformes       | Siluridae        | <i>Silurus</i>            | <i>glanis</i>               | 8                | LC          |    |

|    |           |                      |                  |   |    |
|----|-----------|----------------------|------------------|---|----|
| 58 | Sisoridae | <i>Glyptosternon</i> | <i>oschanini</i> | 1 | LC |
| 59 |           |                      | sp.              | 8 | -  |

127 IUCN, International Union for Conservation of Nature; CR, critically endangered; EN,  
128 endangered; VU, vulnerable; NT, near threatened; LC, least concern; DD, data deficient, -, no  
129 assessment.

130 **Identification of fish species using DNA barcodes** A total of 666 fish samples were  
131 successfully amplified using three primers and PCR. After editing, all COI barcode sequences  
132 were 682 for each sample and the mean nucleotide frequencies of the entire dataset were A  
133 (24.49%), T (29.01%), G (18.50%), and C (28.00%). The genetic distance within species ranged  
134 from 0.000 to 0.0149.

135 For species identification at the species level, a total of 666 COI barcode sequences  
136 representing 59 different species were employed (mean of 11.3 samples per species). The  
137 GenBank and BOLD databases were used for species identification (Table S2). The GenBank-  
138 based identification of all species ranged from 98.58% to 100.00%. The COI sequences of 22  
139 fish species had not been reported in the GenBank database. Among them, *P. hermanni* was  
140 identified as *P. kaufmanni*, *Cottus spinulosus* as *C. ricei*, *L. conocephalus* as *L. capito*, *Alburnus*  
141 *oblongus* and *A. taeniatus* as *A. escherichii*, *Leuciscus lehmanni* and *Petroleuciscus*  
142 *squaliusculus* as *L. baicalensis*, and *Triplophysa* sp. 1 as *T. aliensis* with 99.71%, 98.47%,  
143 98.83–100%, 98.39–98.82%, 99.71–99.85%, and 98.37% similarity, respectively.

144 The BOLD-based identification of 46 fish species ranged from 98.36% to 100%. No  
145 matches were found for 13 species. *Pseudoscaphirhynchus hermanni* was identified as *P.*  
146 *kaufmanni*, *Cottus spinulosus* as *C. ricei*, *A. oblongus* and *A. taeniatus* as *A. escherichii*, *L.*  
147 *lehmanni* and *P. squaliusculus* as *L. baicalensis*, and *Triplophysa* sp. 1 as *T. aliensis* with 99.85–  
148 100%, 98.48%, 98.62–98.92%, 99.8%–100%, and 98.36% similarity, respectively. Despite the



149 GenBank databases, *L. conocephalus*, *Neogobius pallasii*, and *Rhinogobius* sp. were identified  
150 with high similarities (> 99.4%).

151 The Taxon ID tree shows that the specimens formed phylogenetic clusters that reflected  
152 previous taxonomic results based on morphology (Fig. S1). In turn, the barcode gap analysis  
153 revealed that five species lacked a barcode gap (intraspecific K2P distance  $\geq$  interspecific one),  
154 and four species had a low K2P distance to another species ( $\leq 2\%$ ), which indicates that the  
155 majority of the investigated species could be identified by the DNA barcode approach (Table  
156 S3). Generally, the mean K2P distance of a species to its nearest neighbour (NN) was 8.04%  
157 (SD: 0.11%).

158 The mean K2P distances within species, within genera, and within families were 0.22%,  
159 6.33%, and 16.46%, respectively (Table 2; Fig. 1). The largest intraspecific K2P distance was  
160 observed in *Opsariichthys bidens* (five specimens; Fig. 2; Table S3). The specimens obtained  
161 from several species, such as *Abramis brama* (two specimens), *Capoetobrama kuschakewitschi*  
162 (eight specimens), *Gobio nigrescens* (eight specimens), and *Rhinogobius* sp. (37 specimens),  
163 carried the same haplotype (Table S3). The average congeneric distance was approximately 28.8  
164 times higher than the mean conspecific distance, but approximately 2.6 times less than the  
165 average genetic distance between families, thus the average genetic distance grew based on the  
166 taxonomic level.

167 The Barcode Index Number (BIN) discordance report showed that 666 specimens  
168 represented 55 BINs; among them, 45 BINs were taxonomically concordant, five BINs were  
169 taxonomically discordant, and five BINs were singletons. For the best match (BM), best close  
170 match (BCM), and all species barcodes (ASB) analyses of the 666 sequence data set with  
171 singletons, the percentages of correct identification were 94.74%, 94.74%, and 89.03%,

172 respectively; those of ambiguous identification were 4.05%, 4.05%, and 10.51%, respectively;  
 173 those of incorrect identification were 1.2%, 1.2%, and 0.44%, respectively. Moreover, for the  
 174 same three analyses of the dataset without singletons (661 sequences), the percentages of correct  
 175 identification were 95.46%, 95.46%, and 89.71%, respectively; those of ambiguous identification  
 176 were 3.93%, 3.93%, and 10.13%, respectively; those of incorrect identification were 0.6%, 0.6%,  
 177 and 0.15%, respectively (Table 3).

178 **Table 2.** Summary of K2P genetic distances (%) calculated for different taxonomic levels

|                | N   | Taxa | Comparisons | K2P genetic distance (%) |         |              |
|----------------|-----|------|-------------|--------------------------|---------|--------------|
|                |     |      |             | Minimum                  | Maximum | Mean and SD  |
| Within species | 661 | 54   | 6608        | 0.00                     | 1.49    | 0.22 ± 0.00  |
| Within genus   | 309 | 13   | 2534        | 0.00                     | 11.78   | 6.33 ± 0.00  |
| Within family  | 512 | 3    | 75196       | 0.00                     | 22.19   | 16.46 ± 0.00 |

179

180

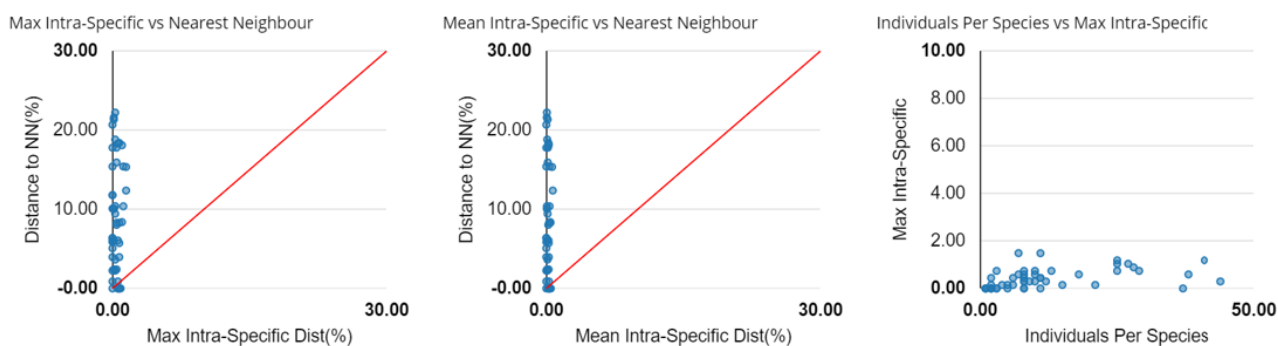

181

182 **Figure 1.** Barcoding gap: Maximum intraspecific Kimura 2-parameter (K2P) distances  
 183 compared with the minimum interspecific K2P distances recorded in fish from Uzbekistan. The  
 184 graphs show the overlap of the maximum and mean intra-specific distances with the inter-  
 185 specific (NN = nearest neighbor) distances.

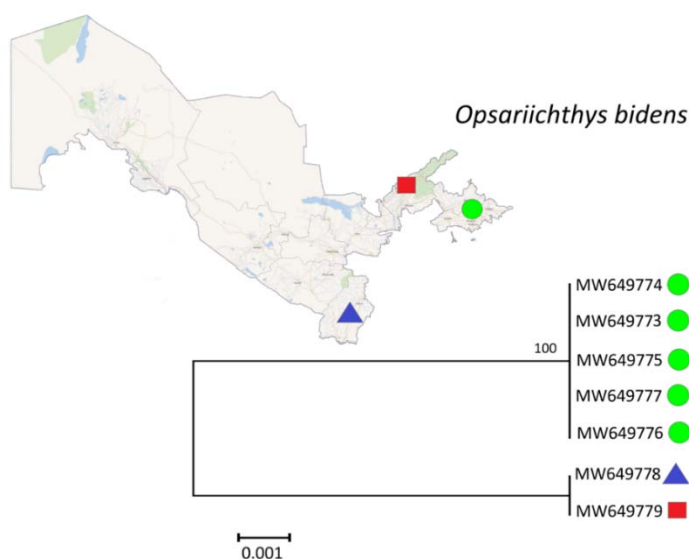

186

187 **Figure 2.** Neighbour-joining tree of *Opsariichthys bidens* from DNA barcode sequences with  
 188 100 000 bootstrapping replicates. Sampling localities: Syr Darya (green circle), Chirchik River  
 189 (red square), and Surkhan Darya (blue triangle).

190

191 **Table 3.** Results of identification success analysis for the criteria: best match, best close match  
 192 and all species barcodes

|                                                   | Best match (%) | Best close match (%) | All species barcodes (%) |
|---------------------------------------------------|----------------|----------------------|--------------------------|
| <i>With singletons</i>                            |                |                      |                          |
| Correct identifications                           | 631 (94.74%)   | 631 (94.74%)         | 593 (89.03%)             |
| Ambiguous identifications                         | 27 (4.05%)     | 27 (4.05%)           | 70 (10.51%)              |
| Incorrect identifications                         | 8 (1.2%)       | 8 (1.2%)             | 3 (0.44%)                |
| Sequences without any match closer than threshold | NA             | NA                   | NA                       |
| <i>Without singletons</i>                         |                |                      |                          |
| Correct identifications                           | 631 (95.46%)   | 631 (95.46%)         | 593 (89.71%)             |
| Ambiguous identifications                         | 26 (3.93%)     | 26 (3.93%)           | 67 (10.13%)              |
| Incorrect identifications                         | 4 (0.6%)       | 4 (0.6%)             | 1 (0.15%)                |
| Sequences without any match closer than threshold | NA             | NA                   | NA                       |

193

194

195 **Automated barcode gap discovery (ABGD) analyses of species delimitation** The ABGD tool  
 196 was used for species delimitation. A partition with prior maximal distance  $P = 0.0359$  and  $0.0046$

197 delimited the entire dataset into 55 putative species (Fig. 3). Of the 59 morphological-based  
198 identified species, 55 (93.22%) were delimited clearly through the ABGD at a prior maximal  
199 distance of 0.0359, which was consistent with the observations of genetic distance and  
200 neighbour-joining (NJ) and Bayesian inference (BI) analyses (Figs. S1 and 4). Furthermore, at a  
201 prior maximal distance of 0.0359, few species, such as *Carassius auratus*, *C. gibelio*, *Gobio*  
202 *lepidolaemus*, *G. sibiricus*, *L. lehmanni*, *P. squaliusculus*, *P. hermanni*, and *P. kaufmanni* could  
203 not be delimited into different putative species. No clear divergence between these  
204 morphologically distinct species was observed in the NJ and BI analyses, with the exception of  
205 *Gobio* species.  
206

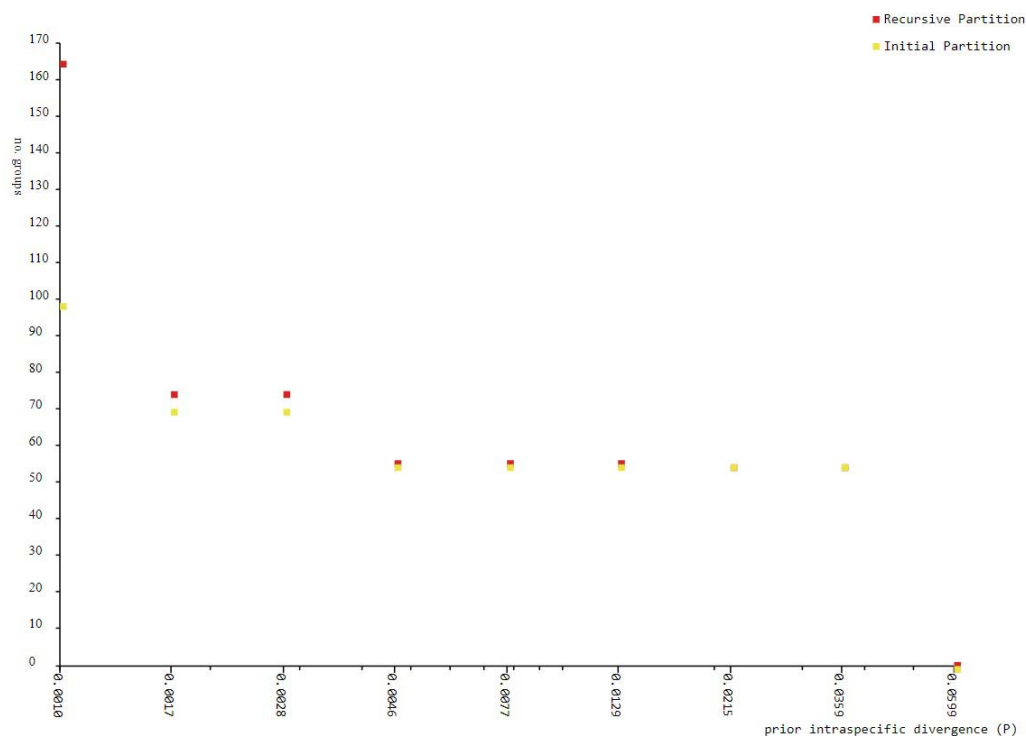

207

208 **Figure 3.** The number of groups inferred from ABGD analysis according to prior intraspecific  
209 divergence ( $P$ )

210

211

212

213

214

215

216

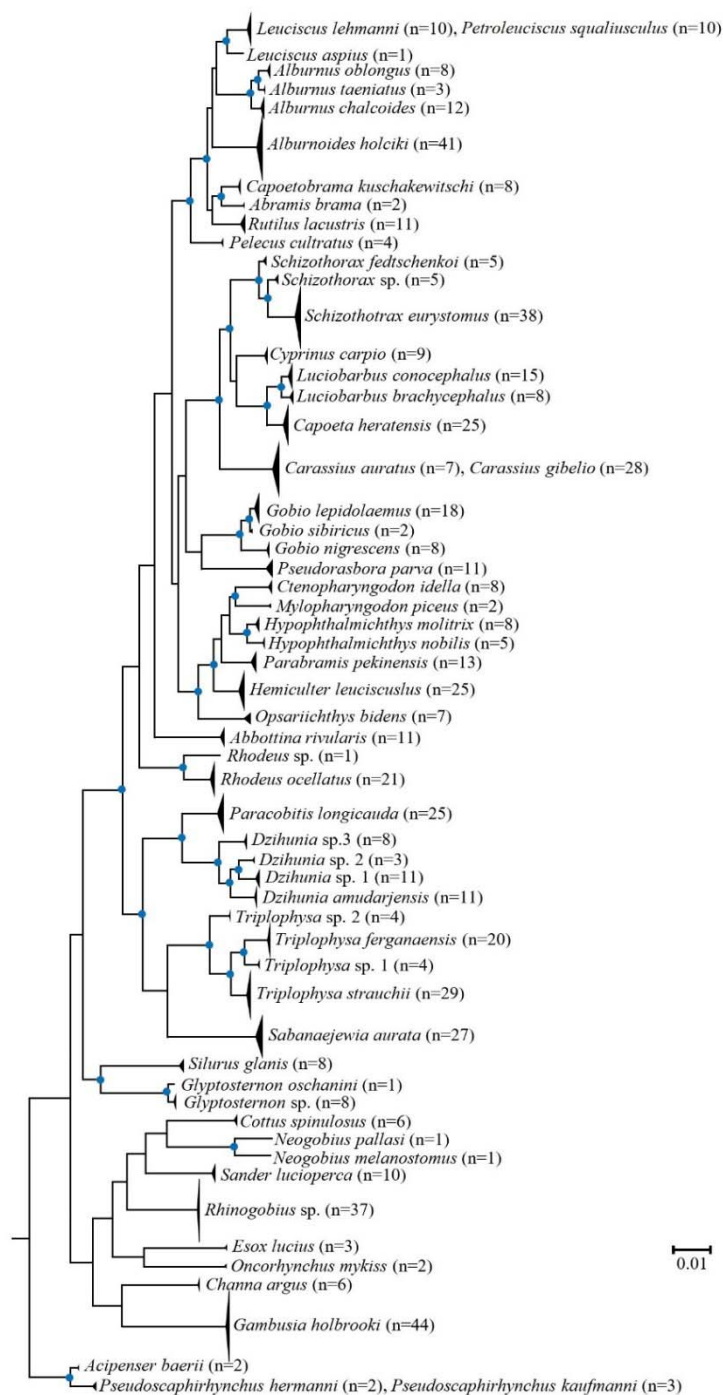

217

218 **Figure 4.** Bayesian inference (BI) consensus tree based on the COI partial gene sequences. The

219 blue circle at nodes represents BI posterior probabilities values >50%. Posterior probability

220 values for all species are >95%.

## 221 Discussion

222 This study of the fish fauna of the inland waters of Uzbekistan is the first to compile the data in a  
223 sequence library, which contributes to the FISH-BOL in the BOLD system. This study included  
224 the molecular identification of 59 species. These 59 species included 83.1% of the reported fish  
225 fauna of the region [45]. Relationships among species are shown in the topology of the BI tree  
226 (Fig. 4).

227 The gap between COI intraspecific and interspecific diversity is called the ‘barcode gap’,  
228 which is decisive for the discriminatory ability of DNA barcoding [52]. The barcode gap can be  
229 seen in our study (Table 2), as well as in many other previous studies [3, 44, 53], thereby further  
230 confirming that this approach is an effective way to distinguish between fish species.

231 This study clarified the taxonomic status of a number of taxa, such as *A. oblongus* and *A.*  
232 *taeniatus*, which belong to *Alburnus*, which is consistent with the results of Matveyev et al. [54]  
233 and Jouladeh-Roudbar et al. [55]; *Schizothorax fedtschenkoi* is a valid species; another  
234 *Schizothorax* sp. from the southern part of the country is an undescribed species; the *Alburnoides*  
235 population (previously considered as *A. eichwaldii*) from the inland waters of Uzbekistan, is de  
236 facto *A. holciki* [49]; three *Gobio* species occur in the inland waters of the country [50];  
237 *Glyptosternon* and *Rhodeus* each consist of two species and not just one, as previously believed;  
238 thus, additional taxonomic research is required; two species of the genus *Neogobius* (*N.*  
239 *melanostomus* and *N. pallasii*) (previously believed to belong to *N. melanostomus* and *N.*  
240 *fluviatilis* [56]) occurred in the lower reaches of the Amu Darya; the population of *Opsariichthys*  
241 in Uzbekistan belongs to the same species, and *O. bidens* is not *O. unirostis* as previously  
242 believed [56]; the entire *Rhinogobius* population in Uzbekistan belongs to the same species  
243 (*Rhinogobius* sp.), which is neither *R. brunneus* nor *R. similis* as previously thought [56, 57];

244 thus, taxonomic clarification is required; moreover, there is only one species of *Gambusia* (*G.*  
245 *holbrooki*) occurring in the waters of Uzbekistan, while previously it was believed that both *G.*  
246 *affinis* and *G. holbrooki* were found in the waters of the country [56, 58] (Figs S1, 4; Table S2).

247 Only a single species of *Petroleuciscus* in Central Asia from the upper reaches of the Syr  
248 Darya, joined with *L. lehmanni* from the Zeravshan River in our phylogenetic analysis based on  
249 the *COI* barcode marker. However, our unpublished work (nuclear molecular and morphology)  
250 showed that they are two separate valid species, and *P. squaliusculus* belongs to *Leuciscus*.

251 Currently, three *Dzhunia* Prokofiev, 2001 species are found in the Amu Darya (*D.*  
252 *amudarjensis*), Zeravshan (*D. ilan*), and Talas (*D. turdakovi*, outside Uzbekistan) rivers [59, 60].  
253 Apparently, the species diversity of *Dzhunia* seems to be much higher than previously thought  
254 (Fig. 4). In addition to *D. amudarjensis*, two more undescribed species were found in the upper  
255 reaches of Amu Darya. Another undescribed species was found in the Chirchik River; however,  
256 members of *Dzhunia* had not previously been found in this river (Fig. 5). On the other hand, *D.*  
257 *ilan* was not found in two of our expeditions to the Zeravshan River; moreover, it is believed that  
258 this species may have become extinct [59].

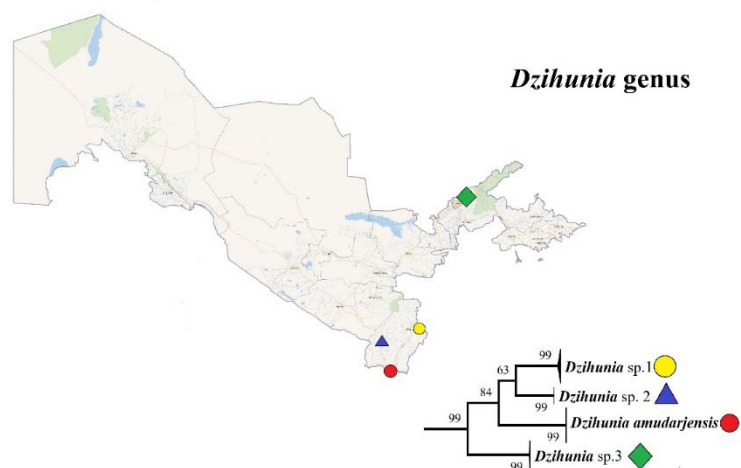

259



260 **Figure 5.** Neighbour-joining tree of *Dzhunia* spp. from DNA barcode sequences with 100  
261 000 bootstrapping replicates. Sampling localities: lower Surkhan Darya (red circle) upper  
262 Surkhan Darya (yellow circle), Sherabad River (blue triangle) and Chirchik River (green square).

263

264 The inability of DNA barcodes to identify species may be due to incomplete sorting by  
265 lineage associated with recent speciation and haplotype sharing as a result of hybridisation. In  
266 our study, DNA barcodes of two *Leuciscus* and *Petroleuciscus* (*L. lehmanni* and *P.*  
267 *squaliusculus*), two *Carassius* (*C. auratus* and *C. gibelio*), and two *Pseudoscaphirhynchus* (*P.*  
268 *hermanni* and *P. kaufmanni*) species were sequenced, and the BIN discordance report illustrated  
269 that these six species could not be distinguished by the COI barcode gene (Figs. S1 and 4). In  
270 this case, a more rapidly evolving DNA fragment, such as the mitochondrial control region  
271 (mtCR) or the first internal transcribed ribosomal DNA spacer (ITS1), may be better for  
272 identification [3].

273 A similar situation occurred with *Carassius* species collected in the Mediterranean basin  
274 [61]. In addition, among the four *Leuciscus* (*L. baicalensis*, *L. bergi*, *L. dzungaricus*, and *L.*  
275 *lindbergi*) species from Central Asia, Russia, and Mongolia, no interspecific differences were  
276 found based on the COI gene (J. Freyhof, personal communication). However, in  
277 *Pseudoscaphirhynchus* species, no interspecies differences were found either when using other  
278 rapidly evolving mtDNA markers [62], the entire mtDNA genome [63], or nDNA markers (our  
279 unpublished data). In fact, these two sturgeon species are morphologically easy to distinguish  
280 from each other [64]. Thus, the complete genome sequencing of *Pseudoscaphirhynchus* may be  
281 important for their molecular authentication.

282           Unexpectedly, *Abbottina rivularis* from Gobionidae is nested with members of the genus  
283 *Rhodeus* from Acheilognathidae in our NJ phylogenetic tree (Fig. S1). Despite the sharp  
284 differences in morphology, the fact that these two genera are sister taxa has also been observed in  
285 previous studies [65, 66].

286           The global fish diversity is currently a serious threat. Along with natural limiting factors to  
287 native species, the negative impact of introduced species is also increasing [67-70]. At the same  
288 time, the negative impact of anthropogenic factors on the biodiversity of freshwater basins is also  
289 growing [71]. The number of biological species is declining annually; therefore, DNA barcoding  
290 is becoming a versatile approach that can be used to assess fish biodiversity, monitor fish  
291 conservation, and manage fishery resources [72-75]. While our DNA barcoding study is  
292 beneficial for the taxonomy and phylogenetics of fishes in the Amu Darya and Syr Darya basins,  
293 it is also important to clarify the taxonomy of misidentified invasive species acclimatised to  
294 Central Asian watersheds [58].

295           Unfortunately, fish diversity in Uzbekistan has decreased in recent years. A rare sturgeon  
296 fish, *Acipenser nudiventris*, is completely extinct in the Aral Sea basin [76]. Another sturgeon  
297 species endemic to the Syr Darya, *Pseudoscaphirhynchus fedtschenkoi*, has been possibly extinct  
298 since the 1990s [63]. The Syr Darya population of *Capoetobrama kuschakewitschi* has not been  
299 recorded in recent decades, and so far, this species has survived only in the lower reaches of the  
300 Amu Darya [77]. *Gymnocephalus cernuus* and *Perca fluviatilis* have not been recorded in water  
301 bodies in the country since the late 1990s [45]. Monitoring the existing populations of other rare  
302 native fish species and studying the negative impact of invasive species on them is advisable.  
303 The traditional monitoring of fish diversity is usually time-consuming, expensive, and labour  
304 intensive. However, with an ever-expanding barcode database and advances in biotechnology

305 (such as environmental DNA analysis), the assessment of fish diversity is becoming more  
306 efficient [78-80]. As our molecular study of fishes develops in Uzbekistan, data on fish species in  
307 this region will become more readily available than ever.

308

## 309 **Methods**

310 **Ethical Statement.** Fish sampling for this research has complied with the Law of the Republic  
311 of Uzbekistan ‘On the protection and use of wildlife’ (No. 545-I 26.12.1997). No  
312 experimentation was conducted on live specimens in the laboratory, and the work performed in  
313 the laboratory followed the rules in the Guide for the Use and Care of Laboratory Animals of  
314 Southwest University.

315

316 **Sample collection and morphological identification.** A total of 666 fish samples were collected  
317 from February 2016 to August 2020 using gill nets or cast nets from 53 distant locations in  
318 different rivers, tributaries, canals, springs, and lakes. Information about the sampling stations,  
319 along with geographical coordinates and sampling dates, is given in Table S1.

320 Initially, all specimens were identified to the species level based on morphological  
321 characteristics following the identification keys of Berg [64, 81] and Mirabdullaev et al. [82]. If  
322 identification was not correctly assigned to a specific species, the ‘sp.’ and ‘cf. abbreviations  
323 were applied [83]. Two pieces of right pectoral fin tissue and muscle tissue were dissected from  
324 each fish specimen and stored in 99% ethanol at -20 °C. Fin-clipped whole specimens and excess  
325 specimens for further morphological analyses were fixed in 10% formalin. After 5–7 days they  
326 were transferred to 70% ethanol for long-term storage and deposited in the Key Laboratory of  
327 Freshwater Fish Reproduction and Development at the Southwest University, School of Life

328 Sciences (China), respectively, with the exception of sturgeon species, which were deposited in  
329 the Department of Biology at the Fergana State University, Faculty of Life Sciences  
330 (Uzbekistan).

331

332 **DNA extraction, COI amplification, and DNA sequencing** Genomic DNA was extracted from  
333 muscle or fin tissues by proteinase K digestion followed by a standard phenol-chloroform  
334 method. The DNA concentration was estimated using a nano-volume spectrophotometer  
335 (NanoDrop 2000; Thermo Fisher Scientific Inc., Waltham, MA, USA) and stored at -20 °C for  
336 further use. Approximately 680 bp were amplified from the 5' region of the COI gene using the  
337 fish-specific primers described by Ivanova et al. [84]: FishF2\_t1 TGT AAA ACG ACG GCC  
338 AGT CGA CTA ATC ATA AAG ATA TCG GCA C and FishR2\_t1 CAG GAA ACA GCT  
339 ATG ACA CTT CAG GGT GAC CGA AGA ATC AGA A, respectively. The following primers  
340 [18] were used for *Gambusia holbrooki*: FishF2-TCG ACT AAT CAT AAA GAT ATC GGC  
341 AC and FishR2-ACT TCA GGG TGA CCG AAG AAT CAG AA. The following primers [85]  
342 were used for sisorid catfishes: catF-TCT CAA CCA ACC ATA AAG ACA TTG G and catR-  
343 TAT ACT TCT GGG TGC CCA AAG AAT CA.

344 The PCR reactions were performed in a final volume of 25 µL, containing 10–100 ng  
345 template DNA, five µmol of each forward and reverse primer, while 12.5 µL of 2× *Taq* Master  
346 Mix (Novoprotein, Guangdong, China) and double-distilled water were also used. The thermal  
347 conditions consisted of an initial step of 3 min at 94 °C followed by 35 cycles of 0.5 min at 94  
348 °C, 45 s at 54 °C, and 1 min 10 s at 72 °C, followed by a final extension of 7 min at 72 °C. The  
349 reactions were performed in an Applied Biosystems thermocycler (Veriti™ 96-Well Thermal  
350 Cycler, Singapore), and the PCR products were evaluated by electrophoresis using 1% agarose

351 gel stained with BioRAD (Universal Hood II; Des Plaines, IL, USA). The PCR products were  
352 sent to TsingKe Biological Technology Co., Ltd. (Chongqing) for sequencing.

353

354 **Molecular data analysis.** All sequences were manually edited using the SeqMan program  
355 (DNASTar software) combined with manual proofreading; all contig sequences started at the first  
356 codon position and ended at the third position; no stop codons were also detected. All obtained  
357 barcodes were uploaded to the BOLD and GenBank databases, and the details are given in Table  
358 S1.

359 The COI barcode sequence of each sample was identified by the scientific name or species  
360 using the BLAST and BOLD databases. Specimens were classified by family, genus, and species  
361 according to the fish taxonomic systems of Fricke et al. [60], and their status was checked in the  
362 IUCN Red List of Threatened Species v. 2020-3. The results of species identification based on  
363 the BLAST and BOLD databases are presented in Table S2.

364 We uploaded the entire data set to BOLD under project title 'Freshwater fishes of  
365 Uzbekistan'. BOLD version 4 analytical tools were used for the following analyses. The distance  
366 summary with the parameter setting the Kalign alignment option [86] and pairwise deletion  
367 (ambiguous base/gap handling) was employed to estimate the Kimura 2-parameter (K2P)  
368 distances for taxonomic ranks at the species, genus, and family levels. Barcode gap analysis was  
369 carried out with the setting of the parameter 'K2P; kalign alignment option; pairwise deletion  
370 (ambiguous base/gap handling)' to construct the distribution of intraspecific and interspecific  
371 genetic distances [nearest neighbour (NN) analysis]. The BIN discordance report was employed  
372 to confirm the exactness of species identification, as well as to check for cases of low levels of  
373 genetic differentiation between different species. The Taxon ID tree was used to construct an NJ

374 tree of the entire 666 sequences with the parameter-setting K2P distance model, the Kalign  
375 alignment algorithm [86], and pairwise deletion (ambiguous base/gap handling).

376 To verify intraspecific and interspecific genetic distances, we also used barcode gap  
377 analyses in ABGD. ABGD was used with K2P with the transition/transversion ratio (TS/TV) set  
378 to 2.0, 10 recursive steps, X (relative gap width) = 1.0; the remaining parameters were set to  
379 default values (Pmin = 0.001, Pmax = 0.1, Nb bins = 20).

380 We also used SPECIESIDENTIFIER v1.7.8 to verify species identification success by  
381 applying three criteria (BM, BCM, and ASB) to the entire barcode dataset, following Meier et al.  
382 [87]. Fish species that had only one sequence (singletons) were automatically assigned as  
383 ‘incorrectly identified’ under the BM and BCM criteria, as there were no conspecific barcoding  
384 sequences to match.

385 For phylogenetic reconstructions, the datasets were analysed based on the BI methodology  
386 using MrBayes 3.2. MrBayes was run with six substitution types (nst = 6), and we considered the  
387 gamma-distributed rate variation and the proportion of invariable positions (GTR+G+I) for the  
388 *COI* datasets. For BI, we ran four simultaneous Monte Carlo Markov chains for 25,000,000  
389 generations, with sampling every 1,000 generations. The chain temperature was set at 0.2. Log-  
390 likelihood stability was determined after 10,000 generations, and we excluded the first 1,000  
391 trees as burn-in. The remaining trees were used to compute a 50% majority-rule consensus tree.  
392 Moreover, to reveal the phylogenetic relationship of some fish species, the NJ tree of the K2P  
393 distance was constructed using MEGA7. Phylogenetic trees were visualised and edited using  
394 FigTree 1.4.2.

395 **Acknowledgements**

396 We are thankful to Elbek Jalolov, Zuhridin Obloqulov, Akbarjon Rozimov, Sirojiddin  
397 Allayarov, and Bahridin Karimov for assistance in the field work. This work was funded by the  
398 grant from the National Natural Science Foundation of China (No. 31872204).

399

400 **Author contributions**

401 Z.P. initiated the project, acquired funding, and managed project administration. B.S. collected  
402 specimens, performed DNA extraction, analyzed the results and wrote the manuscript. Z.P.  
403 reviewed the manuscript. All authors read and approved the final version of the manuscript.

404

405 **Competing interests**

406 The authors declare no competing interests.

407

408 **Data availability**

409 All sequences and associated voucher data are available from BOLD and GenBank.  
410 Voucher metadata are available in Supplementary Information.

411

412 **Additional information**

413 Supplementary Information The online version contains supplementary material available at ...

414 **References**

- 415 1. Fricke, R., Eschmeyer, W. N. & Fong, J. D. *Eschmeyer's Catalog of Fishes: Genera/species*  
416 *by* *family/subfamily*.  
417 <http://researcharchive.calacademy.org/research/ichthyology/catalog/SpeciesByFamily.asp>  
418 (2021).
- 419 2. Nelson, J. S., Grande, T. C. & Wilson, M. V. H. *Fishes of the World* (5th ed.). (John Wiley &  
420 Sons, Hoboken, New Jersey, 2016).
- 421 3. Chang, C. H. *et al.* DNA barcodes of the native ray-finned fishes in Taiwan. *Mol. Ecol.*  
422 *Resour.* **17**, 796–805 (2017).
- 423 4. Kundu, S., Chandra, K., Tyagi, K., Pakrashi, A. & Kumar, V. DNA barcoding of freshwater  
424 fishes from Brahmaputra River in Eastern Himalaya biodiversity hotspot. *Mitochondrial*  
425 *DNA Part B* **4**, 2411–2419 (2019).
- 426 5. Sargent, J. R. & Tacon, A. G. J. Development of farmed fish: a nutritionally necessary  
427 alternative to meat. *Proc. Nutr. Soc.* **58**, 377–383 (1999).
- 428 6. Tacon, A. G. J. & Metian, M. Food matters: fish, income, and food supply – A comparative  
429 analysis. *Rev. Fish. Sci. Aquac.* **26**, 15–28 (2018).
- 430 7. Jackson, J. B. C. *et al.* Historical overfishing and the recent collapse of coastal ecosystems.  
431 *Science* **293**, 629–637 (2001).
- 432 8. Clausen, R. & York, R. Global biodiversity decline of marine and freshwater fish: a cross-  
433 national analysis of economic, demographic, and ecological influences. *Soc. Sci. Res.* **37**,  
434 1310–1320 (2008).
- 435 9. Bryant, M. D. Global climate change and potential effects on Pacific salmonids in freshwater  
436 ecosystems of southeast Alaska. *Clim. Change* **95**, 169–193 (2009).



- 437 10. Dallas, H. F. & Rivers-Moore, N. A. Ecological consequences of global climate change for  
438 freshwater ecosystems in South Africa. *S. Afr. J. Sci.* **110**, 48–58 (2014).
- 439 11. Shelton, J. M. *et al.* Vulnerability of cape fold ecoregion freshwater fishes to climate change  
440 and other human impacts. *Aquat. Conserv.* **28**, 68–77 (2018).
- 441 12. Tillett, B. J. *et al.* Accuracy of species identification by fisheries observers in a north  
442 Australian shark fishery. *Fish. Res.* **127–128**, 109–115 (2012).
- 443 13. Ko, H. L. *et al.* Evaluating the accuracy of morphological identification of larval fishes by  
444 applying DNA barcoding. *PLoS ONE* **8**, e53451.  
445 <https://doi.org/10.1371/journal.pone.0053451> (2013).
- 446 14. Hulley, E. N., Tharmalingam, S., Zarnke, A. & Boreham, D. R. Development and validation  
447 of probe-based multiplex real-time PCR assays for the rapid and accurate detection of  
448 freshwater fish species. *PLoS ONE* **14**, e0210165.  
449 <https://doi.org/10.1371/journal.pone.0210165> (2019).
- 450 15. Krishna Krishnamurthy, P. & Francis, R. A. A critical review on the utility of DNA  
451 barcoding in biodiversity conservation. *Biodivers. Conserv.* **21**, 1901–1919 (2012).
- 452 16. Hopkins, G. W. & Freckleton, R. P. Declines in the number of amateur and professional  
453 taxonomists: implications for conservation. *Anim. Conserv.* **5**, 245–249 (2002).
- 454 17. Hebert, P. D. N., Cywinska, A., Ball, S. L. & deWaard, J. R. Biological identifications  
455 through DNA barcodes. *Proc. R. Soc. Lond. B. Biol. Sci.* **270**, 313–321 (2003).
- 456 18. Ward, R. D., Zemlak, T. S., Innes, H. B., Last, R. P. & Hebert, P. D. N. DNA barcoding  
457 Australia’s fish species. *Philos. Trans. R. Soc. B.* **360**, 1847–1857 (2005).

- 458 19. Lee, E. *et al.* The identification of elephant ivory evidences of illegal trade with  
459 mitochondrial cytochrome b gene and hypervariable D-loop region. *J. Forensic Leg. Med.*  
460 **20**, 174–178 (2013).
- 461 20. Khedkar, T. *et al.* DNA barcoding using skin exuviates can improve identification and  
462 biodiversity studies of snakes. *Mitochondrial DNA Part A* **27**, 499–507 (2016).
- 463 21. Chang, C. H., Jang-Liaw, N. H., Lin, Y. S., Fang, Y. C. & Shao, K. T. Authentication of the  
464 dried seahorses in traditional Chinese medicine market in Taiwan by molecular forensics. *J.*  
465 *Food Drug Anal.* **21**, 310–316 (2013).
- 466 22. Bohmann, K. *et al.* Environmental DNA for wildlife biology and biodiversity monitoring.  
467 *Trends Ecol. Evol.* **29**, 358–367 (2014).
- 468 23. Ford, M. J. *et al.* Estimation of a killer whale (*Orcinus orca*) population’s diet using  
469 sequencing analysis of DNA from feces. *PLoS ONE* **11**, e0144956.  
470 <https://doi.org/10.1371/journal.pone.0144956> (2016).
- 471 24. Moran, Z., Orth, D. J., Schmitt, J. D., Hallerman, E. M. & Aguilar, R. Effectiveness of DNA  
472 barcoding for identifying piscine prey items in stomach contents of piscivorous catfishes.  
473 *Environ. Biol. Fishes* **99**, 161–167 (2016).
- 474 25. Hebert, P. D. N., Stoeckle, M. Y., Zemplak, T. S. & Francis, C. M. Identification of Birds  
475 through DNA Barcodes. *PLoS Biol.* **2**, e312. <https://doi.org/10.1371/journal.pbio.0020312>  
476 (2004).
- 477 26. Feng, C. *et al.* Multiple convergent events created a nominal widespread species: *Triplophysa*  
478 *stoliczkae* (Steindachner, 1866) (Cobitoidea: Nemacheilidae). *BMC Evol. Biol.* **19**, 177.  
479 <https://doi.org/10.1186/s12862-019-1503-3> (2019).

- 480 27. Hofmann, T., Knebelsberger, T., Kloppmann, M., Ulleweit, J. & Raupach, M. J. Egg  
481 identification of three economical important fish species using DNA barcoding in  
482 comparison to a morphological determination. *J. Appl. Ichthyol.* **33**, 925–932 (2017).
- 483 28. Gaston, K. J. Taxonomy of taxonomists, *Nature* **356**, 281–282 (1992).
- 484 29. Bacher, S. Still not enough taxonomists: reply to Joppa *et al.* *Trends Ecol. Evol.* **27**, 65–66  
485 (2011).
- 486 30. Bariche, M. *et al.* Red Sea fishes in the Mediterranean Sea: a preliminary investigation of a  
487 biological invasion using DNA barcoding. *J. Biogeogr.* **42**, 2363–2373 (2015).
- 488 31. Gonçalves, P. F. M., Oliveira-Marques, A. R., Matsumoto, T. E. & Miyaki, C. Y. DNA  
489 Barcoding Identifies Illegal Parrot Trade. *J. Hered.* **106**, 560–564 (2015).
- 490 32. Ruppert, K. M., Kline, R. J. & Rahman, M. S. Past, present, and future perspectives of  
491 environmental DNA (eDNA) metabarcoding: A systematic review in methods, monitoring,  
492 and applications of global eDNA. *Glob. Ecol. Conserv.* **17**, e00547.  
493 <https://doi.org/10.1016/j.gecco.2019.e00547> (2019).
- 494 33. Van der Heyde, M. *et al.* Testing multiple substrates for terrestrial biodiversity monitoring  
495 using environmental DNA (eDNA) metabarcoding. *Mol. Ecol. Resour.* **20**, 732–745 (2020).
- 496 34. Cawthorn, D. M., Steinman, H. A. & Witthuhn, R. C. Evaluation of the 16S and 12S rRNA  
497 genes as universal markers for the identification of commercial fish species in South Africa.  
498 *Gene* **491**, 40–48 (2012).
- 499 35. Srivastava, G. K., Rajput, N., Jadav, K. K., Shrivastav, A. B. & Joshi, H. R. Single nucleotide  
500 markers of D-loop for identification of Indian wild pig (*Sus scrofa cristatus*). *Vet. World* **8**,  
501 532–536 (2015).

- 502 36. Kappel, K., Haase, I., Käppel, C., Sotelo, C. G. & Schröder, U. Species identification in  
503 mixed tuna samples with next-generation sequencing targeting two short cytochrome *b* gene  
504 fragments. *Food Chem.* **234**, 212–219 (2017).
- 505 37. Hebert, P. D. N., Penton, E. H., Burns, J. M., Janzen, D. H. & Hallwachs, W. Ten species in  
506 one: DNA barcoding reveals cryptic species in the neotropical skipper butterfly *Astraptes*  
507 *fulgerator*. *PNAS* **101**, 14812–14817 (2004).
- 508 38. Kochzius, M. *et al.* Identifying Fishes through DNA Barcodes and Microarrays. *PLoS ONE*  
509 **5**, e12620. <https://doi.org/10.1371/journal.pone.0012620> (2010).
- 510 39. Brandon-Mong, G. J. *et al.* DNA metabarcoding of insects and allies: an evaluation of  
511 primers and pipelines. *Bull. Entomol. Res.* **105**, 717–727 (2015).
- 512 40. Ward, R. D., Hanner, R. & Hebert, P. D. N. The campaign to DNA barcode all fishes, FISH-  
513 BOL. *J. Fish Biol.* **74**, 329–356 (2009).
- 514 41. Becker, S., Hanner, R. & Steinke, D. Five years of FISH-BOL: Brief status report.  
515 *Mitochondrial DNA* **22**, 3–9 (2011).
- 516 42. Ratnasingham, S. & Hebert, P. D. N. BOLD: The Barcode of Life Data System  
517 (<http://www.barcodinglife.org>). *Mol. Ecol. Notes* **7**, 355–364 (2007).
- 518 43. Keskin, E. & Atar, H. H. DNA barcoding commercially important fish species of Turkey.  
519 *Mol. Ecol. Resour.* **13**, 788–797 (2013).
- 520 44. Ali, F. S., Ismail, M. & Aly, W. DNA barcoding to characterize biodiversity of freshwater  
521 fishes of Egypt. *Mol. Biol. Rep.* **47**, 5865–5877 (2020).
- 522 45. Mirabdullaev, I. M. & Mullabaev, N. R. Ichthyofauna of Uzbekistan: Modern state and  
523 taxonomy. *J. Biol. Uzbekistan* **5**, 43–49 (2020).

- 524 46. Aladin, N. V. & Potts, W. T. W. Changes in the Aral Sea ecosystems during the period  
525 1960–1990. *Hydrobiologia* **237**, 67–79 (1992).
- 526 47. Karthe, D., Chalov, S. & Borchardt, D. Water resources and their management in central  
527 Asia in the early twenty first century: status, challenges and future prospects. *Environ.*  
528 *Earth Sci.* **73**, 487–499 (2014).
- 529 48. Sheraliev, B. & Peng, Z. *Triplophysa ferganaensis*, a new loach species from Fergana Valley  
530 in Central Asia (Teleostei: Nemacheilidae). *J. Fish Biol.* <https://doi.org/10.1111/jfb.14764>  
531 (2021).
- 532 49. Sheraliev, B., Allayarov, S. & Peng, Z. DNA barcoding revealed a wider distribution of  
533 *Alburnoides holciki* (Teleostei: Leuciscidae) in the inland waters of Uzbekistan. *J. Appl.*  
534 *Ichthyol.* **37**, 1–6. <https://doi.org/10.1111/jai.14206> (2021).
- 535 50. Sheraliev, B., Allayarov, S. & Peng, Z. First records of *Gobio nigrescens* and *Gobio sibiricus*  
536 (Cypriniformes: Gobionidae) from the Amu Darya River basin, Uzbekistan. *J. Appl.*  
537 *Ichthyol.* **36**, 235–239 (2020).
- 538 51. Kuchboev, A. *et al.* Molecular analysis of polymorphic species of the genus *Marshallagia*  
539 (Nematoda: Ostertagiinae). *Parasites Vectors* **13**, 411. [https://doi.org/10.1186/s13071-020-](https://doi.org/10.1186/s13071-020-04265-1)  
540 [04265-1](https://doi.org/10.1186/s13071-020-04265-1) (2020).
- 541 52. Čandek, K. & Kuntner, M. DNA barcoding gap: reliable species identification over  
542 morphological and geographical scales. *Mol. Ecol. Resour.* **15**, 268–277 (2014).
- 543 53. Guimarães-Costa, A. J. *et al.* Fish diversity of the largest deltaic formation in the Americas -  
544 a description of the fish fauna of the Parnaíba Delta using DNA Barcoding. *Sci. Rep.* **9**,  
545 7530. <https://doi.org/10.1038/s41598-019-43930-z> (2019).

- 546 54. Matveyev, M. P., Levina, M. A., Mamilov, N. S. & Levin, B. A. Tashkent riffle minnow  
547 *Alburnoides oblongus* belongs to the genus *Alburnus* (Osteichthyes: Cyprinidae) as inferred  
548 from mitochondrial and nuclear DNA markers. *Inland Water Biol.* **10**, 360–367 (2017).
- 549 55. Jouladeh-Roudbar, A., Ghanavi, H. R. & Doadrio, I. Ichthyofauna From Iranian Freshwater:  
550 Annotated Checklist, Diagnosis, Taxonomy, Distribution and Conservation Assessment.  
551 *Zool. Stud.* **59**, 21. <https://doi.org/10.6620/ZS.2020.59-21> (2020).
- 552 56. Froese, R. & Pauly, D. FishBase. World Wide Web electronic publication.  
553 [www.fishbase.org](http://www.fishbase.org), version (02/2021) (2021).
- 554 57. Atamuratova, M. S. *Ichthyofauna of reservoirs in the Akhangaran river basin*. PhD thesis.  
555 Tashkent. (2021).
- 556 58. Mauroner, A. Central Asia. *IUCN Freshwater Fish Specialist Group*  
557 <http://www.iucnffsg.org/about-ffsg/ffsg-regions/centralasia/> (2014).
- 558 59. Prokofiev, A. M. *Loaches of the subfamily Nemacheilinae of the World*. (Filigran, Yaroslavl,  
559 2017).
- 560 60. Fricke, R., Eschmeyer, W. N. & van der Laan, R. *Eschmeyer's catalog of fishes: Genera,*  
561 *species,* *references.*  
562 <http://researcharchive.calacademy.org/research/ichthyology/catalog/fishcatmain.asp> (2021).
- 563 61. Geiger, M. F. *et al.* Spatial heterogeneity in the Mediterranean Biodiversity Hotspot affects  
564 barcoding accuracy of its freshwater fishes. *Mol. Ecol. Resour.* **14**, 1210–1221 (2014).
- 565 62. Dillman, C. B. *et al.* Molecular systematics of Scaphirhynchinae: an assessment of North  
566 American and Central Asian Freshwater Sturgeon Species. *J. Appl. Ichthyol.* **23**, 290–296  
567 (2007).

- 568 63. Nedoluzhko, A. V. *et al.* Molecular phylogeny of one extinct and two critically endangered  
569 Central Asian sturgeon species (genus *Pseudoscaphirhynchus*) based on their mitochondrial  
570 genomes. *Sci. Rep.* **10**, 722. <https://doi.org/10.1038/s41598-020-57581-y> (2020).
- 571 64. Berg, L. S. *The Freshwater fishes of the U.S.S.R. and adjacent countries*, Vol.1. (Academy of  
572 Sciences of the USSR Press, Moscow, Leningrad: 1948).
- 573 65. Chen, W., Ma, X., Shen, Y., Mao, Y. & He, S. The fish diversity in the upper reaches of the  
574 Salween River, Nujiang River, revealed by DNA barcoding. *Sci. Rep.* **5**, 17437.  
575 <https://doi.org/10.1038/srep17437> (2015).
- 576 66. Shen, Y., Guan, L., Wang, D. & Gan, X. DNA barcoding and evaluation of genetic diversity  
577 in Cyprinidae fish in the midstream of the Yangtze River. *Ecol. Evol.* **6**, 2702–2713 (2016).
- 578 67. Crivelli, A. J. Are fish introductions a threat to endemic freshwater fishes in the northern  
579 Mediterranean region? *Biol. Conserv.* **72**, 311–319 (1995).
- 580 68. Rainbow, P. Impacts of invasions by alien species. *J. Zool.* **246**, 247–248 (1998).
- 581 69. Lusk, S., Lusková, V. & Hanel, L. Alien fish species in the Czech Republic and their impact  
582 on the native fish fauna. *Folia Zool.* **59**, 57–72 (2010).
- 583 70. Balestrieri, A., Remonti, L., Vezza, P., Prigioni, C. & Copp, G. H. Do non-native fish as prey  
584 favour the conservation of the threatened indigenous Eurasian otter? *Freshw. Biol.* **58**, 995–  
585 1007 (2013).
- 586 71. Tickner, D. *et al.* Bending the Curve of Global Freshwater Biodiversity Loss: An Emergency  
587 Recovery Plan. *BioScience* **70**, 330–342 (2020).
- 588 72. Takahara, T., Minamoto, T. & Doi, H. Using environmental DNA to estimate the distribution  
589 of an Invasive fish species in ponds. *PLoS ONE*, **8**, e56584.  
590 <https://doi.org/10.1371/journal.pone.0056584> (2013).

- 591 73. Muchlisin, Z. A. *et al.* Assessing the species composition of tropical eels (Anguillidae) in  
592 Aceh Waters, Indonesia, with DNA barcoding gene *cox1*. *F1000Research* **6**, 258.  
593 <https://doi.org/10.12688/f1000research.10715.1> (2017).
- 594 74. Ran, K., Li, Q., Qi, L., Li, W. & Kong, L. DNA barcoding for identification of marine  
595 gastropod species from Hainan island, China. *Fish. Res.* **225**, 105504.  
596 <https://doi.org/10.1016/j.fishres.2020.105504> (2020).
- 597 75. Gilbey, J. *et al.* Life in a drop: Sampling environmental DNA for marine fishery management  
598 and ecosystem monitoring. *Mar. Policy* **124**, 104331.  
599 <https://doi.org/10.1016/j.marpol.2020.104331> (2021).
- 600 76. Sturgeon Specialist Group. *Acipenser nudiventris* Aral Sea stock. The IUCN Red List of  
601 Threatened Species 1996: e.T251A13048150.  
602 <https://dx.doi.org/10.2305/IUCN.UK.1996.RLTS.T251A13048150.en> (1996).
- 603 77. Mamilov, N. & Karimov, B. *Capoetobrama kuschakewitschi*. The IUCN Red List of  
604 Threatened Species, 2020, e.T169620A156732450.  
605 <https://dx.doi.org/10.2305/IUCN.UK.2020-3.RLTS.T169620A156732450.en> (2020).
- 606 78. Harper, L. R. *et al.* Prospects and challenges of environmental DNA (eDNA) monitoring in  
607 freshwater ponds. *Hydrobiologia* **826**, 25–41 (2019).
- 608 79. Sales, N. G. *et al.* Fishing for mammals: Landscape-level monitoring of terrestrial and semi-  
609 aquatic communities using eDNA from riverine systems. *J. Appl. Ecol.* **57**, 707–716 (2020).
- 610 80. Zou, K. *et al.* eDNA metabarcoding as a promising conservation tool for monitoring fish  
611 diversity in a coastal wetland of the Pearl River Estuary compared to bottom trawling. *Sci.*  
612 *Total Environ.* **702**, 134704. <https://doi.org/10.1016/j.scitotenv.2019.134704> (2020).



- 613 81. Berg, L. S. *Fishes of Fresh Waters of the USSR and Adjacent Countries*. Vol. 2. (Academy of  
614 Sciences of the USSR Press, Moscow, Leningrad, 1949).
- 615 82. Mirabdullaev, I. M., Mirzaev, U. T., Kuzmetov, A. R. & Kimsanov, Z. O. *Keys to fishes of*  
616 *Uzbekistan and adjacent regions*. (Sano-Standard Press, Tashkent, 2011).
- 617 83. Kottelat, M. & Freyhof, J. *Handbook of European freshwater fishes*. (Kottelat, Cornol &  
618 Freyhof, Berlin, 2007).
- 619 84. Ivanova, N. V., Zemlak, T. S., Hanner, R. H. & Hebert, P. D. N. Universal primer cocktails  
620 for fish DNA barcoding. *Mol. Ecol. Notes* **7**, 544–548. [https://doi.org/10.1111/j.1471-](https://doi.org/10.1111/j.1471-8286.2007.01748.x)  
621 [8286.2007.01748.x](https://doi.org/10.1111/j.1471-8286.2007.01748.x) (2007).
- 622 85. Sullivan, J. P., Peng, Z., Lundberg, J. G., Peng, J. & He, S. Molecular evidence for diphyly of  
623 the Asian catfish family Amblycipitidae (Teleostei: Siluriformes) and exclusion of the  
624 South American Aspredinidae from Sisoroidea. *Proc. Acad. Nat. Sci. Philadelphia* **157**, 51–  
625 65 (2008).
- 626 86. Lassmann, T. & Sonnhammer, E. L. Kalign – an accurate and fast multiple sequence  
627 alignment algorithm. *BMC Bioinform.* **6**, 298. <https://doi.org/10.1186/1471-2105-6-298>  
628 (2005).
- 629 87. Meier, R., Shiyang, K., Vaidya, G. & Ng, P. K. L. DNA barcoding and taxonomy in Diptera:  
630 a tale of high intraspecific variability and low identification success. *Syst. Biol.* **55**, 715–728  
631 (2006).
